# Supplementary material for: Plasminogen activator inhibitor-1 (PAI-1) 4G/5G promoter polymorphisms and risk of venous thromboembolism – a meta-analysis and systematic review
Source: Atypon-hosted journal article supplement (doi:10.1024/0301-1526/a000839), 2020-01-10
Supplement: 0301-1526_a000839_esm1.pdf [file 0301-1526_a000839_esm1.pdf]

**ESM 1 – Table:** Analysis results of genetic model.

| Genetic model         | Heterogeneity test        |                      | Statistical model | Test for overall effect |                 | Begg's test     | Egger's test    |
|-----------------------|---------------------------|----------------------|-------------------|-------------------------|-----------------|-----------------|-----------------|
|                       | <i>I</i> <sup>2</sup> (%) | <i>P<sub>h</sub></i> |                   | OR (95 % CI)            | <i>P</i> -value | <i>P</i> -value | <i>P</i> -value |
| 4G vs 5G              | 84.30 %                   | 0.000                | R                 | 1.25 [1.05, 1.49]       | 0.014           | 0.574           | 0.051           |
| 4G/4G+5G/4G vs 5G/5G  | 78.7 %                    | 0.000                | R                 | 1.38 [1.06, 1.81]       | 0.019           | 0.574           | 0.112           |
| 4G/4G vs 5G/4G+5G/5G  | 65.80 %                   | 0.000                | R                 | 1.34 [1.10, 1.63]       | 0.004           | 0.388           | 0.348           |
| 4G/4G+ 5G/5G vs 5G/4G | 64.80 %                   | 0.000                | R                 | 0.98 [0.83, 1.17]       | 0.856           | 0.680           | 0.605           |
| 4G/4G vs 5G/5G        | 74.20 %                   | 0.000                | R                 | 1.59 [1.17, 2.15]       | 0.003           | 0.851           | 0.419           |
| 5G/4G vs 5G/5G        | 73.50 %                   | 0.000                | R                 | 1.27 [1.00, 1.65]       | 0.049           | 0.476           | 0.298           |

R: random effect model; F: fixed effect model
