# Supplementary material for: Plasminogen activator inhibitor-1 (PAI-1) 4G/5G promoter polymorphisms and risk of venous thromboembolism – a meta-analysis and systematic review
Source: Atypon-hosted journal article supplement (doi:10.1024/0301-1526/a000839), 2020-01-10
Supplement: 0301-1526_a000839_esm2.pdf [file 0301-1526_a000839_esm2.pdf]

**ESM 2 – Table:** Results of ethnic subgroup analysis.

| Model                 | Group     | Number of studies | Association test |              |       | Heterogeneity |       |                |
|-----------------------|-----------|-------------------|------------------|--------------|-------|---------------|-------|----------------|
|                       |           |                   | OR               | 95 % CI      | p-val | Model         | p-val | I <sup>2</sup> |
| 4Gvs5G                | Asian     | 7                 | 1.55             | [1.28, 1.88] | 0.000 | Random        | 0.010 | 60.30 %        |
|                       | Caucasian | 19                | 1.12             | [0.86, 1.48] | 0.400 | Random        | 0.000 | 87.70 %        |
|                       | Mixed     | 1                 | 1.04             | [0.86, 1.26] | 0.677 | --            | --    | --             |
| 4G/4G+5G/4Gvs5G/5G    | Asian     | 7                 | 1.56             | [1.19, 2.03] | 0.001 | Fixed         | 0.086 | 42.20 %        |
|                       | Caucasian | 19                | 1.27             | [0.82, 1.96] | 0.276 | Random        | 0.000 | 84.20 %        |
|                       | Mixed     | 1                 | 1.10             | [0.80, 1.50] | 0.561 | --            | --    | --             |
| 4G/4Gvs5G/4G+5G/5G    | Asian     | 7                 | 1.90             | [1.46, 2.48] | 0.000 | Random        | 0.039 | 50.80 %        |
|                       | Caucasian | 19                | 1.12             | [0.86, 1.45] | 0.399 | Random        | 0.000 | 62.30 %        |
|                       | Mixed     | 1                 | 1.02             | [0.73, 1.41] | 0.927 | --            | --    | --             |
| 4G/4G+ 5G/5G vs 5G/4G | Asian     | 7                 | 1.26             | [1.01, 1.58] | 0.040 | Fixed         | 0.095 | 40.80 %        |
|                       | Caucasian | 20                | 0.87             | [0.69, 1.09] | 0.220 | Random        | 0.000 | 63.90 %        |
|                       | Mixed     | 1                 | 0.94             | [0.72,1.24]  | 0.662 | --            | --    | --             |
| 4G/4Gvs5G/5G          | Asian     | 7                 | 2.24             | [1.68,2.98]  | 0.000 | Fixed         | 0.186 | 29.20 %        |
|                       | Caucasian | 19                | 1.31             | [0.81,2.11]  | 0.276 | Random        | 0.000 | 79.30 %        |
|                       | Mixed     | 1                 | 1.08             | [0.73,1.61]  | 0.690 | --            | --    | --             |
| 5G/4Gvs5G/5G          | Asian     | 7                 | 1.22             | [0.94,1.57]  | 0.133 | Fixed         | 0.197 | 27.90 %        |
|                       | Caucasian | 19                | 1.27             | [0.84,1.91]  | 0.258 | Random        | 0.000 | 80.2 %         |
|                       | Mixed     | 1                 | 1.10             | [0.79,1.53]  | 0.560 | --            | --    | --             |
