# Supplementary material for: Plasminogen activator inhibitor-1 (PAI-1) 4G/5G promoter polymorphisms and risk of venous thromboembolism – a meta-analysis and systematic review
Source: Atypon-hosted journal article supplement (doi:10.1024/0301-1526/a000839), 2020-01-10
Supplement: 0301-1526_a000839_esm3.pdf [file 0301-1526_a000839_esm3.pdf]

**ESM 3 – Table:** Sensitivity analysis results.

| Sensitivity analysis                    | Heterogeneity         |          | Effect Size       |          |
|-----------------------------------------|-----------------------|----------|-------------------|----------|
|                                         | <i>I</i> <sup>2</sup> | <i>P</i> | OR (95 % CI)      | <i>P</i> |
| 4Gvs5G                                  |                       |          |                   |          |
| Exclude Farajzadeh (2014) <sup>12</sup> | 68.70 %               | 0.000    | 1.20 (1.05, 1.37) | 0.008    |
| 4G/4G+5G/4Gvs5G/5G                      |                       |          |                   |          |
| Exclude Farajzadeh (2014) <sup>12</sup> | 79.5 %                | 0.000    | 1.38 (1.04, 1.83) | 0.026    |
| 4G/4Gvs5G/4G+5G/5G                      |                       |          |                   |          |
| Exclude Farajzadeh (2014) <sup>12</sup> | 55.5 %                | 0.000    | 1.29 (1.08, 1.54) | 0.006    |
| 4G/4G+ 5G/5G vs 5G/4G                   |                       |          |                   |          |
| Exclude Farajzadeh (2014) <sup>12</sup> | 65.90 %               | 0.000    | 0.99 (0.83, 1.19) | 0.918    |
| 4G/4Gvs5G/5G                            |                       |          |                   |          |
| Exclude Farajzadeh (2014) <sup>12</sup> | 75.00 %               | 0.000    | 1.59 (1.16, 2.19) | 0.004    |
| 5G/4Gvs5G/5G                            |                       |          |                   |          |
| Exclude Farajzadeh (2014) <sup>12</sup> | 74.4 %                | 0.000    | 1.27(0.97, 1.66)  | 0.087    |
